# Supplementary material
Source: Springer Nature journal article supplement (https://www.springermedizin.de/resource/supplementary/12957_2013_1582_MOESM4_ESM.pdf/9563924)

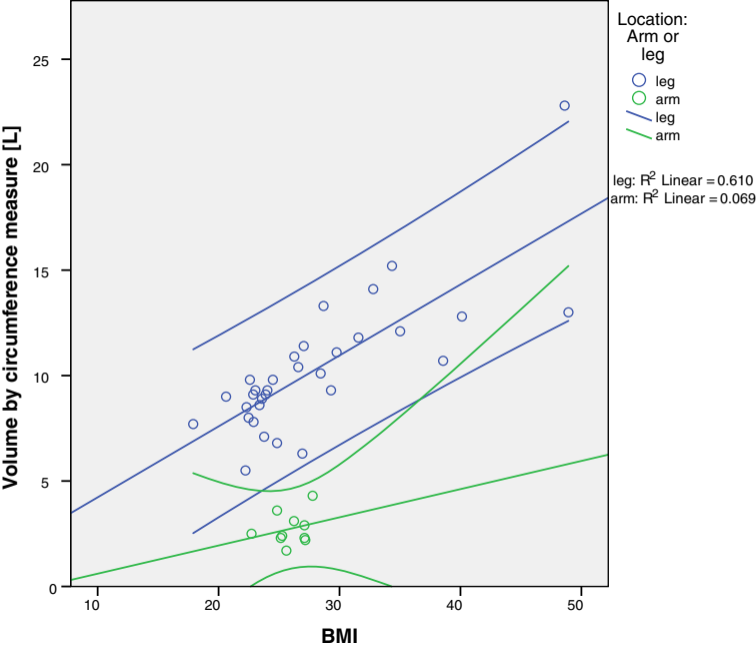

Supplement: MOESM4 [file 9563924]
